# Supplementary material for: Molecular mechanism of the Escherichia coli AhpC in the function of a chaperone under heat-shock conditions
Source: PubMed Central journal article supplement (PMC6147784; doi:10.1038/s41598-018-32527-7), 2018-09-20
Supplement: 41598_2018_32527_MOESM1_ESM.pdf [file 41598_2018_32527_MOESM1_ESM.pdf]

**Molecular mechanism of the *Escherichia coli* AhpC in the function of a chaperone under heat-shock conditions**

Neelagandan Kamariah<sup>a</sup>, Birgit Eisenhaber<sup>a</sup>, Frank Eisenhaber<sup>a,b</sup> and Gerhard Grüber<sup>a,c,\*</sup>

<sup>a</sup> Bioinformatics Institute, Agency for Science, Technology and Research (A\*STAR), 30 Biopolis Street, #07-01 Matrix, Singapore 138671, Republic of Singapore

<sup>b</sup> School of Computer Engineering, Nanyang Technological University (NTU), 50 Nanyang Drive, Singapore 637553, Republic of Singapore

<sup>c</sup> School of Biological Sciences, Nanyang Technological University, 60 Nanyang Drive, Singapore 637551, Republic of Singapore

\* To whom correspondence may be addressed:

Prof. Dr. Gerhard Grüber, Tel.: + 65 - 6316 2989; Fax: + 65 - 6791 3856

E-mail: [ggrueber@ntu.edu.sg](mailto:ggrueber@ntu.edu.sg)

**Keywords:** Oxidative stress, antioxidant, peroxiredoxins, heat-shock, chaperone, molecular evolution

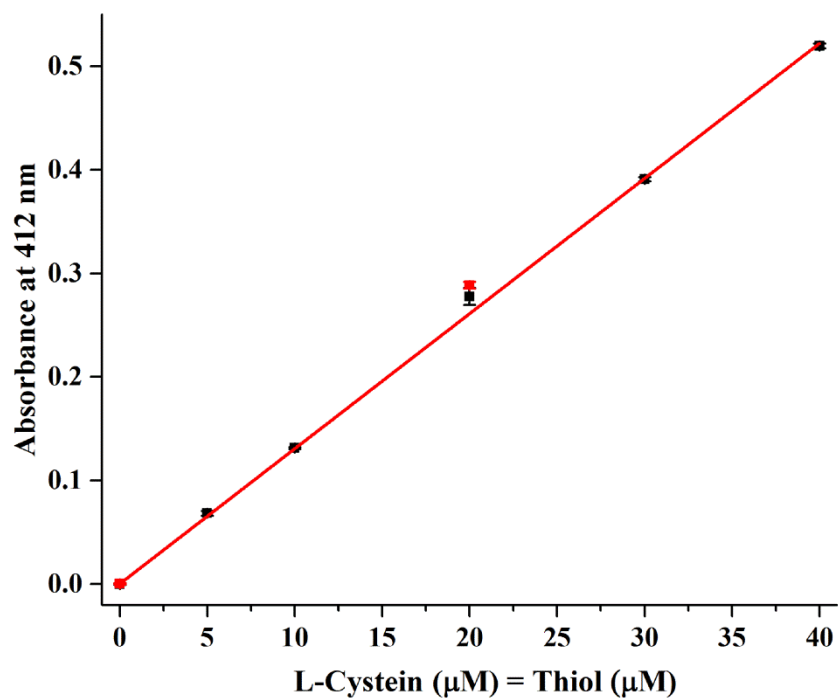

**Supplementary Figure S1.** *Standard curve for free thiol quantification.* The standard curve is generated by reacting DNTB with different molar concentrations of 0-40 μM L-cysteine (*black square*), followed by detection of the TNB produced at  $\lambda = 412$  nm, which was used to calculate the free thiol content of 10 μM of recombinant WT *EcAhpC* (*red square*). The oxidized *EcAhpC* was estimated to contain  $0 \pm 0.03$  thiol per monomer and the reduced *EcAhpC* contains  $2.1 \pm 0.3$  thiols per monomer.

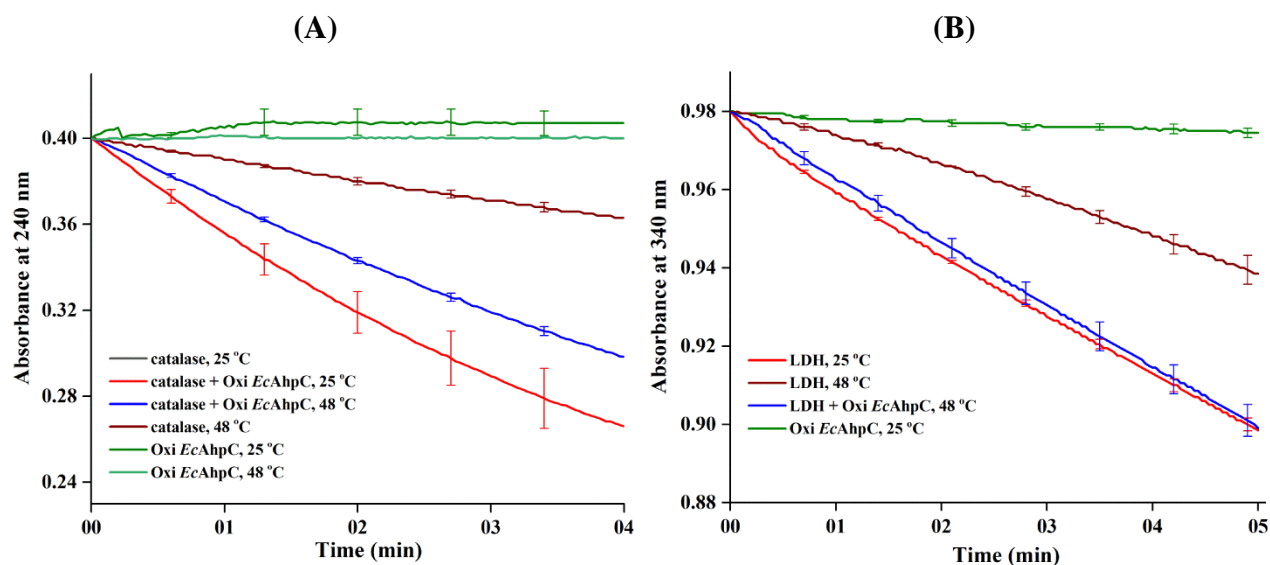

**Supplementary Figure S2. Catalase and LDH activity assay.** (A) The decrease in absorbance at  $\lambda = 240$  nm resulting from decomposition of  $\text{H}_2\text{O}_2$  was measured to assess the catalase activity in the presence of oxidized *EcAhpC* at 25 °C and 48 °C. Oxidized *EcAhpC* alone did not show  $\text{H}_2\text{O}_2$ -decomposition activity at 25 °C and 48 °C (*green*), since no decrease in absorbance was observed. (B) The decrease in NADH absorbance at  $\lambda = 340$  nm was measured to assess the enzymatic activity of LDH in the presence of oxidized *EcAhpC* at 25 °C and 48 °C. The absence of LDH did not show NADH oxidase activity at 25 °C (*green*), since no decrease in absorbance was observed at 340 nm.

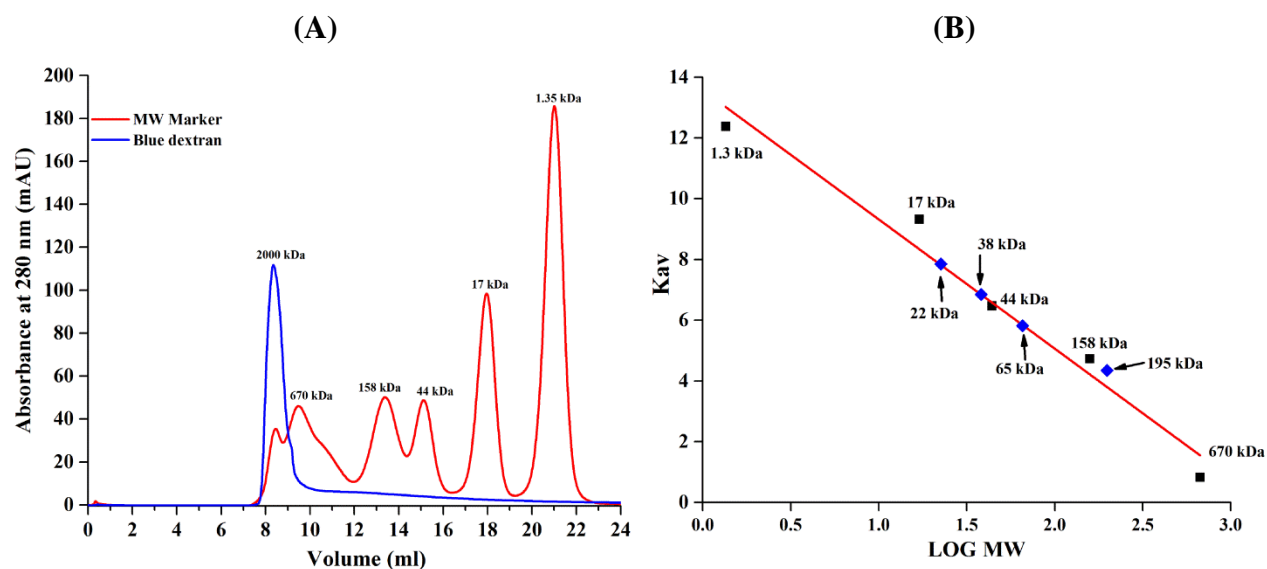

**Supplementary Figure S3. Calibration curve of the SEC.** (A) Elution profiles from Superdex 200 10/300 GL column (GE Healthcare) for the calibration of standards (thyroglobulin 670 kDa,  $\gamma$ -globulin 158 kDa, ovalbumin 44 kDa, myoglobin 17 kDa and vitamin B<sub>12</sub> 1.35 kDa) and blue dextran 2000 as absorption in milliabsorption units (mAU) at  $\lambda = 280$  nm versus volume in milliliters (ml). (B) The calibration curve of the Superdex 200 10/300 GL column was prepared using protein standards (*black squares*). The Kav value was calculated using the equation  $K_{av} = (V_e - V_o)/(V_c - V_o)$ , where  $V_o$  = column void volume = 8.3 ml,  $V_c$  = geometric column volume = 23.6 ml and  $V_e$  = elution volume for each protein: thyroglobulin (670 kDa)  $V_e = 9.48$  ml,  $\gamma$ -globulin (158 kDa)  $V_e = 13.38$ , ovalbumin (44 kDa)  $V_e = 15.12$ , myoglobin (17 kDa)  $V_e = 17.97$ , and vitamin B<sub>12</sub> (1.35 kDa)  $V_e = 21.03$ . For each protein samples, the observed  $V_e$  was used to calculate the corresponding Kav value that was used to determine the molecular mass. The estimated molecular mass of oxidized *EcAhpC* decamer (195 kDa), LDH (65 kDa), oxidized *EcAhpC* dimer (38 kDa) and reduced *EcAhpC* monomer (22 kDa) is shown (*blue diamond*).

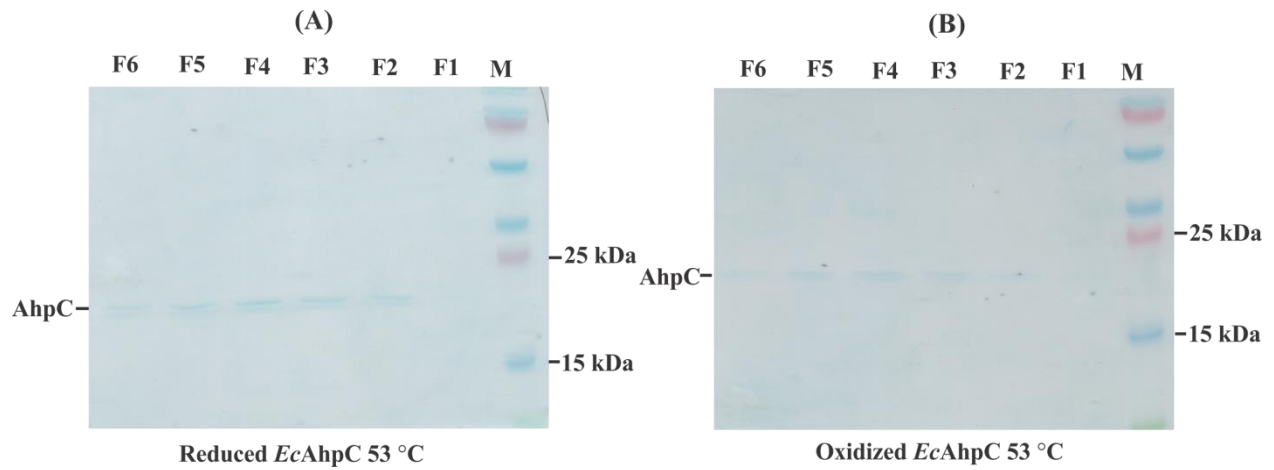

**Supplementary Figure S4.** *HMW oligomers forming ability of reduced and oxidized EcAhpC at 53 °C.* (A) SDS-PAGE analysis (full-length gel is presented) of the 8 ml elution fractions (F1 to F6) as indicated in the chromatogram (Fig. 4A) of reduced *EcAhpC* incubated at 53 °C for 60 min. (B) A similar 8 ml elution fractions (F1 to F6) of oxidized *EcAhpC* incubated at 53 °C for 60 min has been collected and tested on SDS-PAGE analysis. The amount of formed HMW oligomers of reduced *EcAhpC* at this temperature was higher compared to oxidized *EcAhpC*.
